# Supplementary material
Source: PubMed Central journal article supplement (PMC55417)

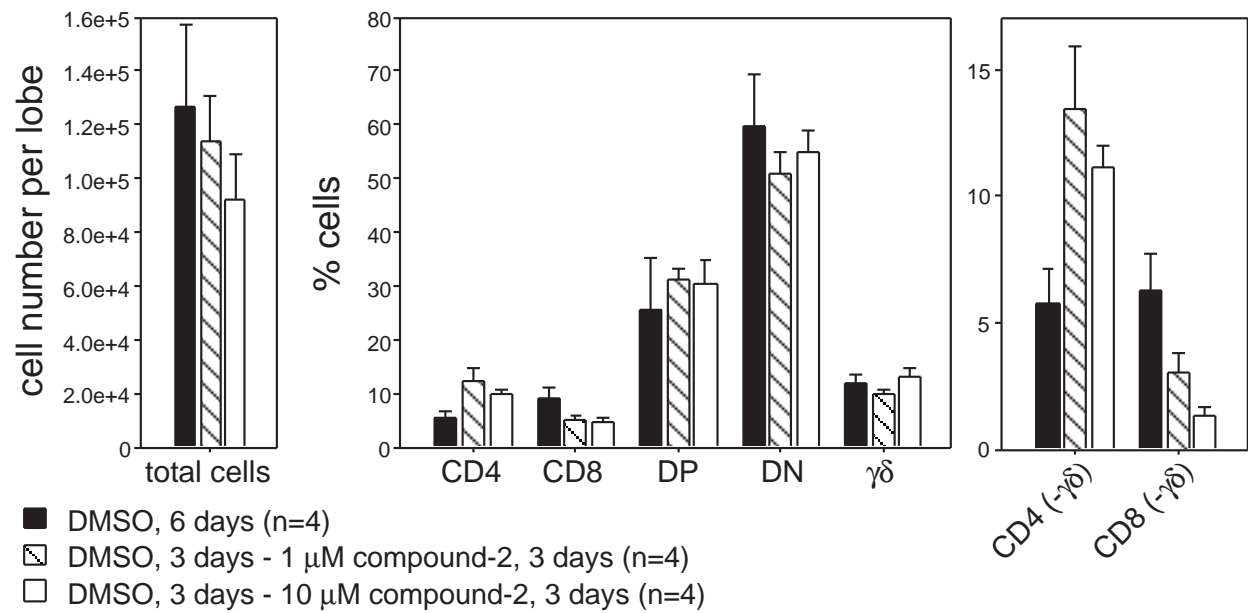

Supplement: pnas_161102498_2.pdf [file pnas_161102498_2.pdf]
